# Supplementary material
Source: Springer Nature journal article supplement (https://www.springermedizin.de/resource/supplementary/13030_2007_13_MOESM4_ESM.pdf/9644546)

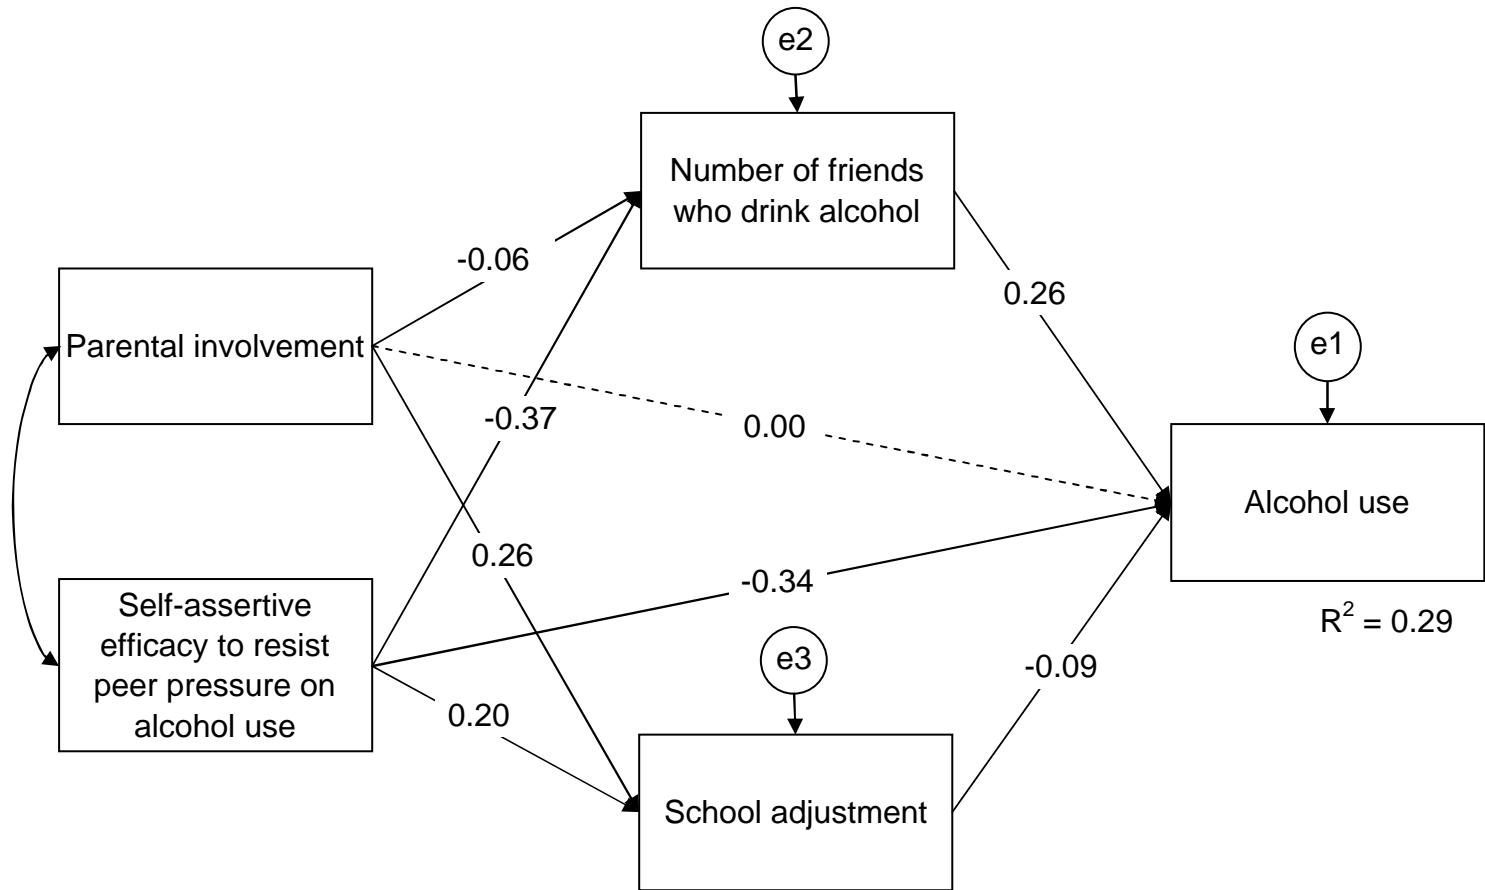

Supplement: MOESM4 [file 9644546]
